# Supplementary material for: Pre-monsoon submicron aerosol composition and source contribution in the Kathmandu Valley, Nepal
Source: Royal Society of Chemistry journal article supplement (doi:10.1039/d2ea00008c), 2022-01-01
Supplement: d2ea00008c1.pdf [file d2ea00008c1.pdf]

### Supplemental Information for Pre-monsoon Submicron Aerosol Composition and Source Contribution in the Kathmandu Valley, Nepal by Werden et al.

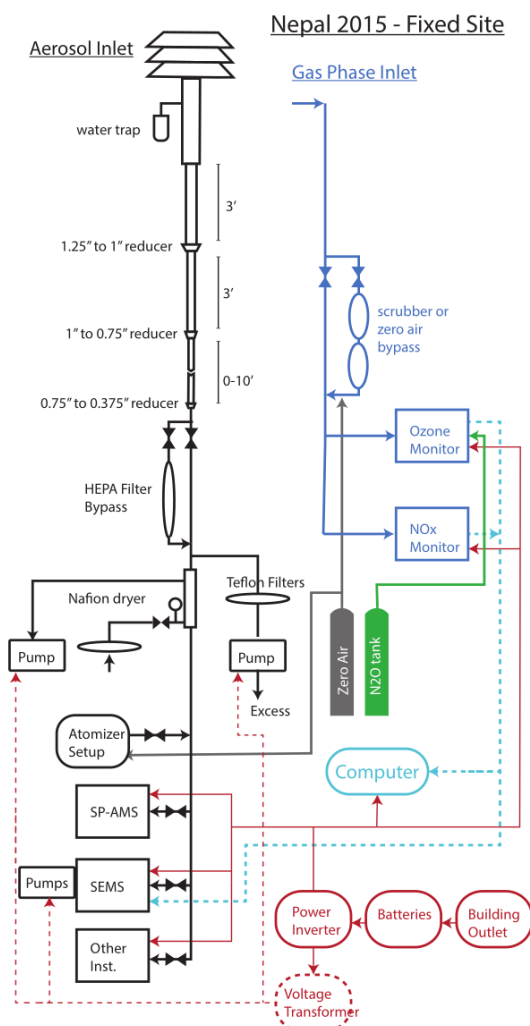

Figure SI1: NAMaSTE inlet setup for particle and gas phase measurements from Bode Thimi, Nepal, April 2015.

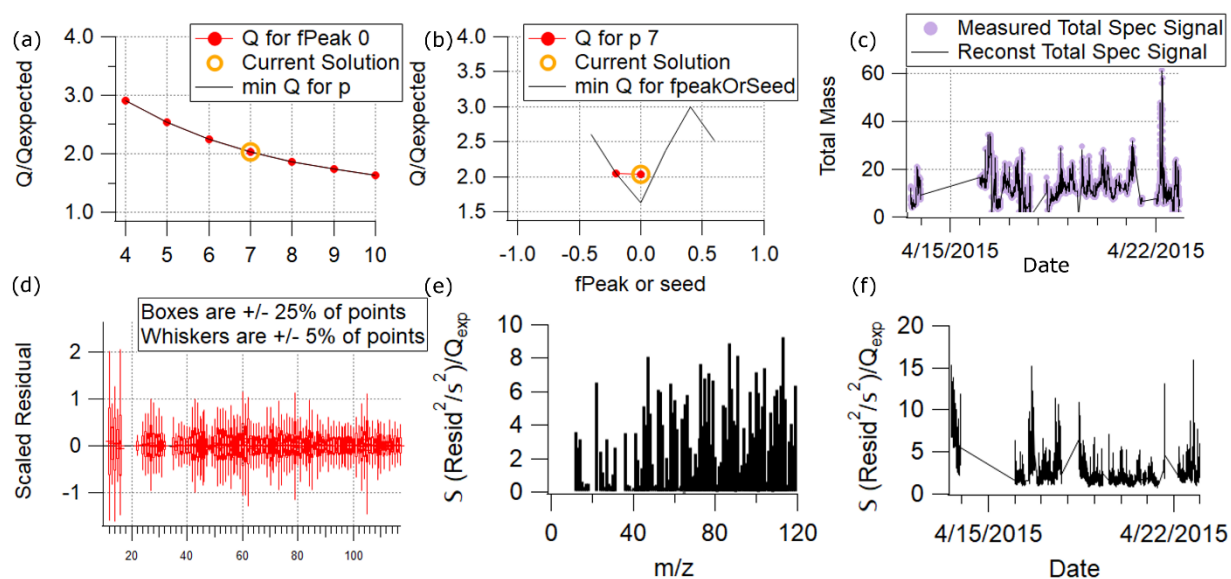

Figure S12: AMS-PMF heuristics of (a)  $Q/Q_{\text{exp}}$  for each solution size, (b)  $Q/Q_{\text{exp}}$  to each FPEAK within the selected solution, (c) time series of total mass, (d) scaled residuals for each  $m/z$  for the solution, (e) Residuals for each  $m/z$  for the PMF solution, (f) Residual time series for the PMF solution, for NAMaSTE1 in the Kathmandu Valley, April 2015.

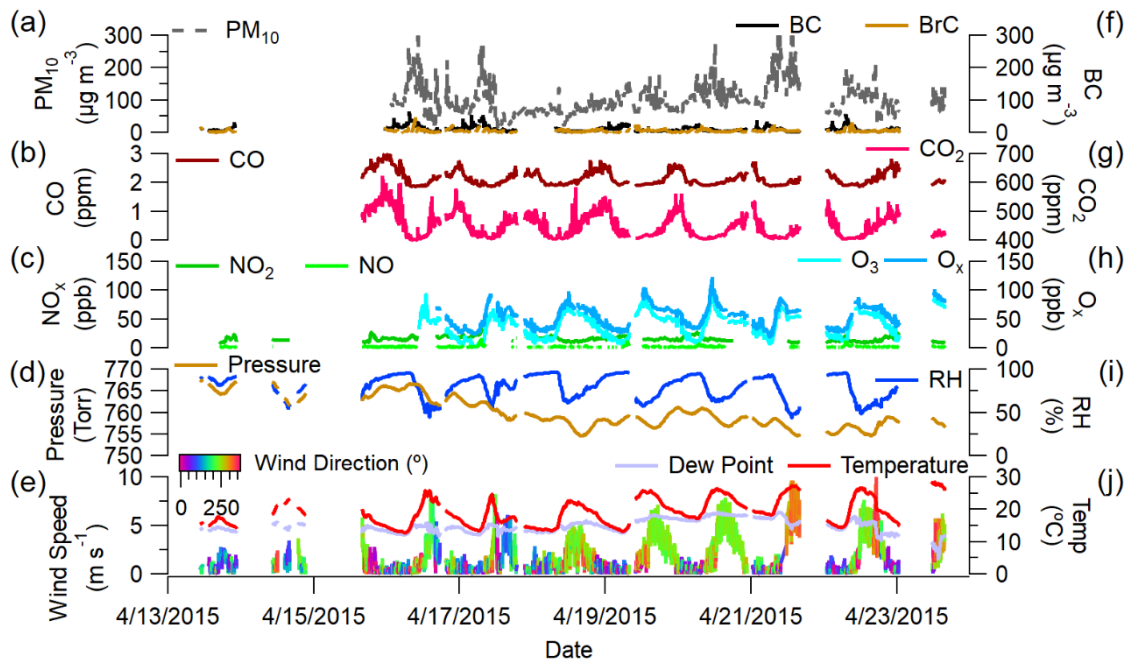

Figure S13: Optical particulate PM<sub>10</sub> (a), black and brown carbon (f), gas-phase CO (b), NO and NO<sub>2</sub> (c), CO<sub>2</sub> (g), O<sub>x</sub> and O<sub>3</sub> (h), and meteorological measurements of pressure (d), wind speed colored by direction (e), relative humidity (i), and temperature and dew point (j), measurements available coincident with AMS measurements for NAMaSTE1 in the Kathmandu Valley, Nepal, April 2015.

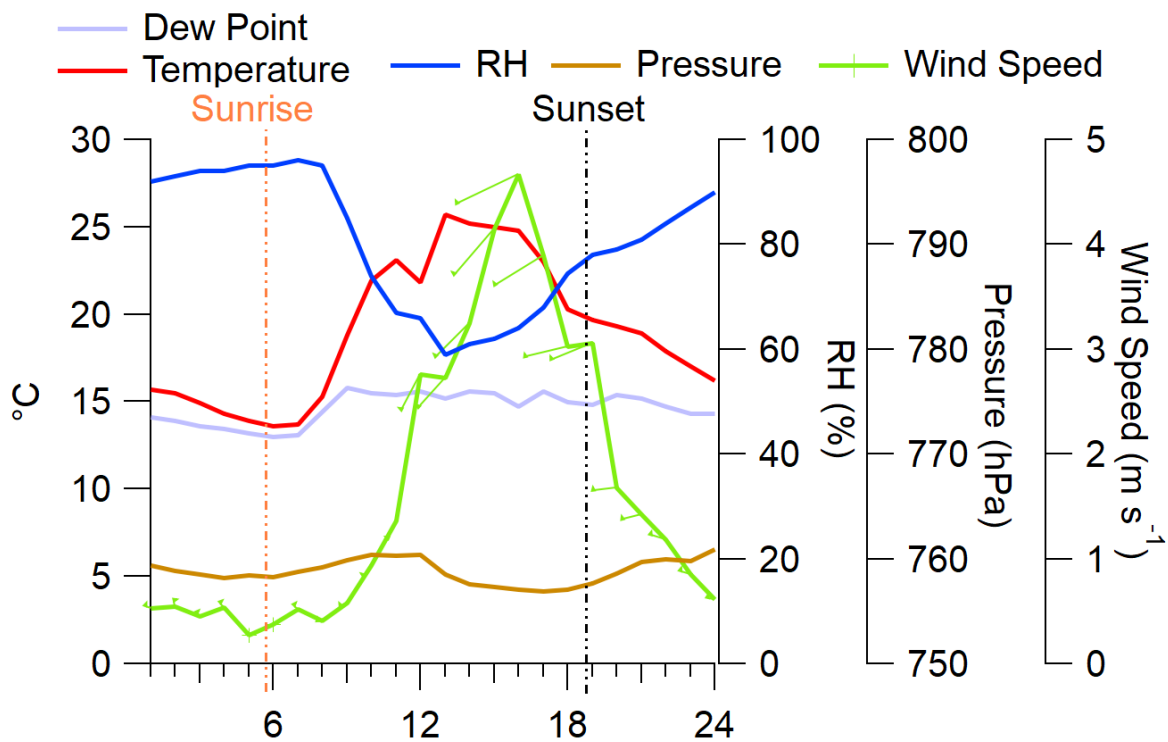

Figure S14: Weather metric diurnal cycle for NAMaSTE1 in April 2015 at Bode in Kathmandu Valley, Nepal.

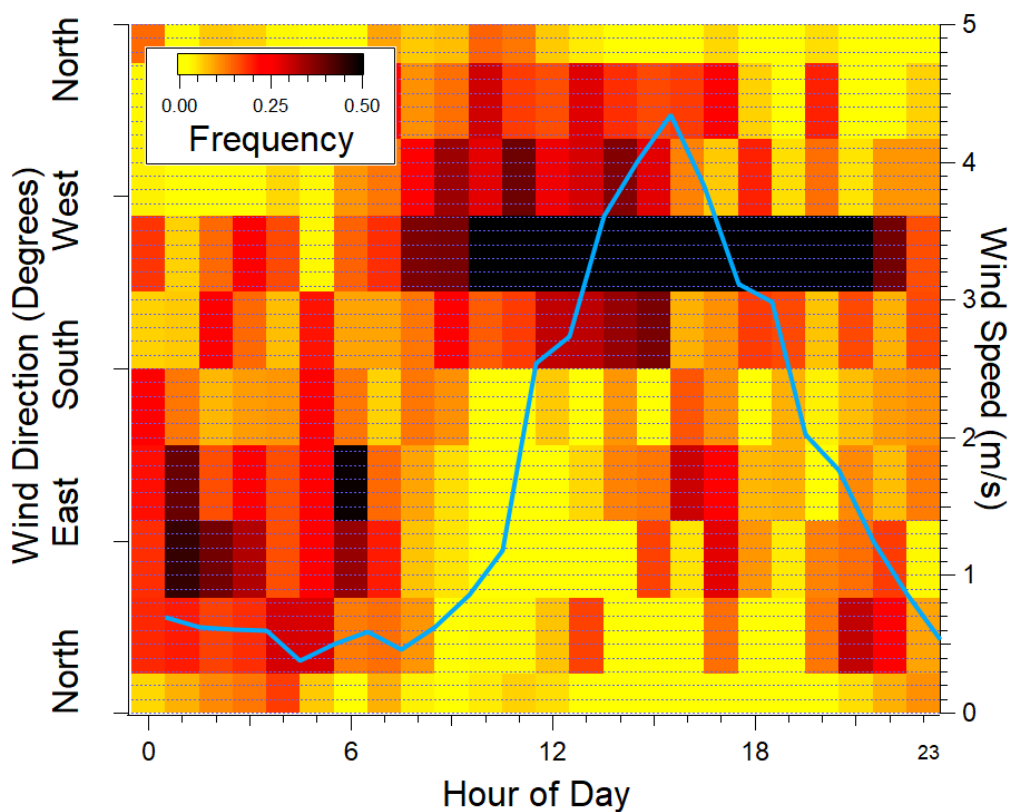

Figure SI5: Wind Diurna for April 2015, Bode, Madhyapur, Kathmandu Valley, Nepal. Wind direction binned by frequency of occurrence over 5 minutes (degrees), Wind Speed mean ( $m s^{-1}$ ).

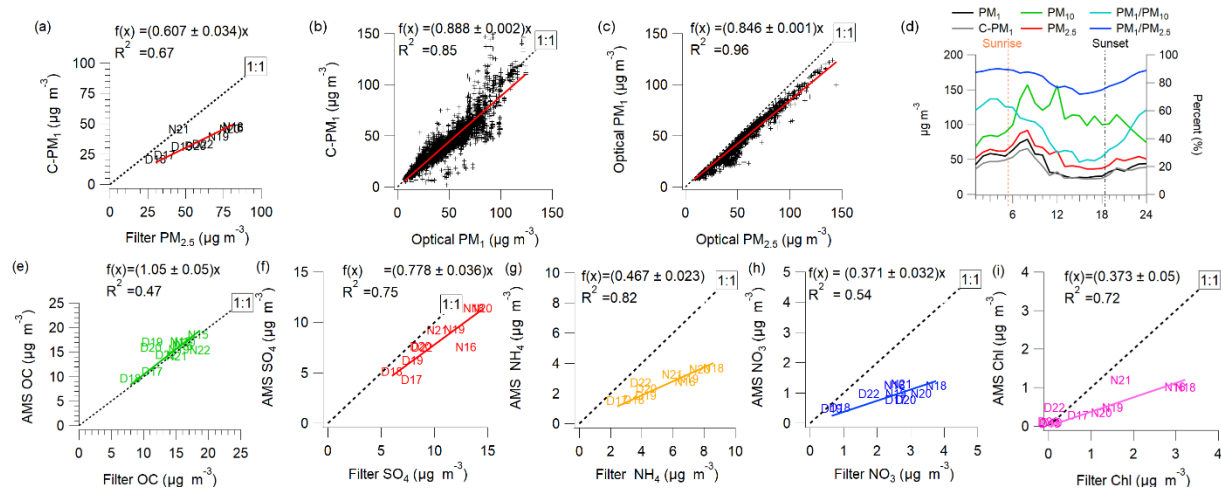

Figure SI6: Comparison of different co-located PM measurement methods from Bode in the Kathmandu Valley during NAMaSTE1 in April 2015. (a) C-PM<sub>1</sub> and filter based PM<sub>2.5</sub>, (b) C-PM<sub>1</sub> and optical PM<sub>1</sub>, (c) optical PM<sub>1</sub> and PM<sub>2.5</sub>, (d) diurnal fraction of PM sizes and size fractions. Comparison of AMS OC and OMM-CMB OC sources (e) OC, (f) sulfate, (g) ammonium, (h) nitrate, (i) chloride.

Table SI1: Meteorological Conditions at Bode in Madhyapur Thimi, Kathmandu Valley, Nepal, April 2015.

|                                  | Average | $\sigma$ | Min  | Max   |
|----------------------------------|---------|----------|------|-------|
| Temperature ( $^{\circ}$ C)      | 19.2    | 3.5      | 12.9 | 28.6  |
| Pressure (hPa)                   | 760     | 3        | 755  | 767   |
| Relative Humidity (%)            | 80      | 14       | 44   | 100   |
| Wind Speed ( $\text{m s}^{-1}$ ) | 1.71    | 1.77     | 0    | 10.23 |
| Dew Point ( $^{\circ}$ C)        | 15.0    | 2.1      | 4.4  | 19.3  |

Table S12: Diurnal averages of PM<sub>1</sub> chemical species for NAMaSTE1, April 2015, Bode, Kathmandu Valley, Nepal.

| Diurnal Hour | C-PM <sub>1</sub><br>( $\mu\text{g m}^{-3}$ ) | BC <sub>880nm</sub><br>( $\mu\text{g m}^{-3}$ ) | BrC<br>( $\mu\text{g m}^{-3}$ ) | Org<br>( $\mu\text{g m}^{-3}$ ) | SO <sub>4</sub> <sup>2-</sup><br>( $\mu\text{g m}^{-3}$ ) | NH <sub>4</sub> <sup>+</sup><br>( $\mu\text{g m}^{-3}$ ) | Cl <sup>-</sup><br>( $\mu\text{g m}^{-3}$ ) | NO <sub>3</sub> <sup>-</sup><br>( $\mu\text{g m}^{-3}$ ) | Wind Speed<br>( $\text{m s}^{-1}$ ) |
|--------------|-----------------------------------------------|-------------------------------------------------|---------------------------------|---------------------------------|-----------------------------------------------------------|----------------------------------------------------------|---------------------------------------------|----------------------------------------------------------|-------------------------------------|
| 1            | 36.8                                          | 12.6                                            | 1.9                             | 15.5                            | 7.3                                                       | 2.6                                                      | 0.7                                         | 1.4                                                      | 0.6                                 |
| 2            | 44.9                                          | 14.8                                            | -                               | 15.4                            | 10.0                                                      | 3.4                                                      | 0.9                                         | 1.4                                                      | 0.6                                 |
| 3            | 49.6                                          | 17.0                                            | -                               | 14.7                            | 11.6                                                      | 4.3                                                      | 1.9                                         | 1.5                                                      | 0.6                                 |
| 4            | 46.0                                          | 15.5                                            | 0.4                             | 14.3                            | 10.8                                                      | 3.8                                                      | 1.3                                         | 1.4                                                      | 0.6                                 |
| 5            | 46.4                                          | 16.6                                            | 0.5                             | 14.9                            | 10.6                                                      | 3.7                                                      | 1.2                                         | 1.4                                                      | 0.4                                 |
| 6            | 53.0                                          | 17.5                                            | -                               | 15.1                            | 11.7                                                      | 4.1                                                      | 1.5                                         | 1.5                                                      | 0.5                                 |
| 7            | 62.3                                          | 21.0                                            | 1.3                             | 16.5                            | 12.4                                                      | 4.4                                                      | 1.9                                         | 1.7                                                      | 0.6                                 |
| 8            | 75.8                                          | 24.0                                            | 0.5                             | 20.5                            | 14.1                                                      | 5.6                                                      | 3.0                                         | 2.2                                                      | 0.5                                 |
| 9            | 64.6                                          | 16.9                                            | 4.4                             | 23.4                            | 13.2                                                      | 5.2                                                      | 2.4                                         | 2.6                                                      | 0.6                                 |
| 10           | 52.8                                          | 14.3                                            | 6.3                             | 24.2                            | 11.0                                                      | 4.3                                                      | 1.5                                         | 2.6                                                      | 0.9                                 |
| 11           | 28.0                                          | 9.5                                             | 2.7                             | 23.3                            | 6.0                                                       | 2.1                                                      | 0.2                                         | 1.0                                                      | 1.1                                 |
| 12           | 33.3                                          | 7.6                                             | 2.2                             | 15.4                            | 6.3                                                       | 2.1                                                      | 0.2                                         | 1.0                                                      | 2.1                                 |
| 13           | 25.0                                          | 5.0                                             | 1.8                             | 15.6                            | 4.8                                                       | 1.7                                                      | 0.1                                         | 0.9                                                      | 2.7                                 |
| 14           | 26.2                                          | 5.2                                             | 1.8                             | 13.7                            | 5.2                                                       | 1.8                                                      | 0.2                                         | 0.9                                                      | 3.6                                 |
| 15           | 23.5                                          | 4.9                                             | 1.4                             | 13.0                            | 5.5                                                       | 1.8                                                      | 0.2                                         | 0.5                                                      | 3.8                                 |
| 16           | 20.3                                          | 3.8                                             | 1.3                             | 10.3                            | 5.1                                                       | 1.6                                                      | 0.1                                         | 0.4                                                      | 4.1                                 |
| 17           | 21.0                                          | 4.6                                             | 1.4                             | 9.6                             | 5.1                                                       | 1.6                                                      | 0.1                                         | 0.4                                                      | 3.7                                 |
| 18           | 20.7                                          | 4.3                                             | 1.6                             | 9.3                             | 4.7                                                       | 1.4                                                      | 0.1                                         | 0.4                                                      | 2.9                                 |
| 19           | 24.7                                          | 5.8                                             | 2.6                             | 10.2                            | 4.7                                                       | 1.6                                                      | 0.2                                         | 0.6                                                      | 2.7                                 |
| 20           | 37.4                                          | 8.0                                             | 4.4                             | 13.3                            | 5.2                                                       | 1.9                                                      | 0.4                                         | 1.2                                                      | 1.7                                 |
| 21           | 34.8                                          | 7.3                                             | 3.8                             | 20.9                            | 5.5                                                       | 1.9                                                      | 0.4                                         | 1.0                                                      | 1.5                                 |
| 22           | 35.9                                          | 9.3                                             | 2.7                             | 17.4                            | 6.3                                                       | 2.2                                                      | 0.4                                         | 1.1                                                      | 1.1                                 |
| 23           | 37.1                                          | 9.9                                             | 2.4                             | 16.5                            | 7.2                                                       | 2.5                                                      | 0.6                                         | 1.1                                                      | 0.8                                 |
| 24           | 35.2                                          | 10.4                                            | 2.4                             | 15.1                            | 7.2                                                       | 2.3                                                      | 0.4                                         | 1.0                                                      | 0.5                                 |

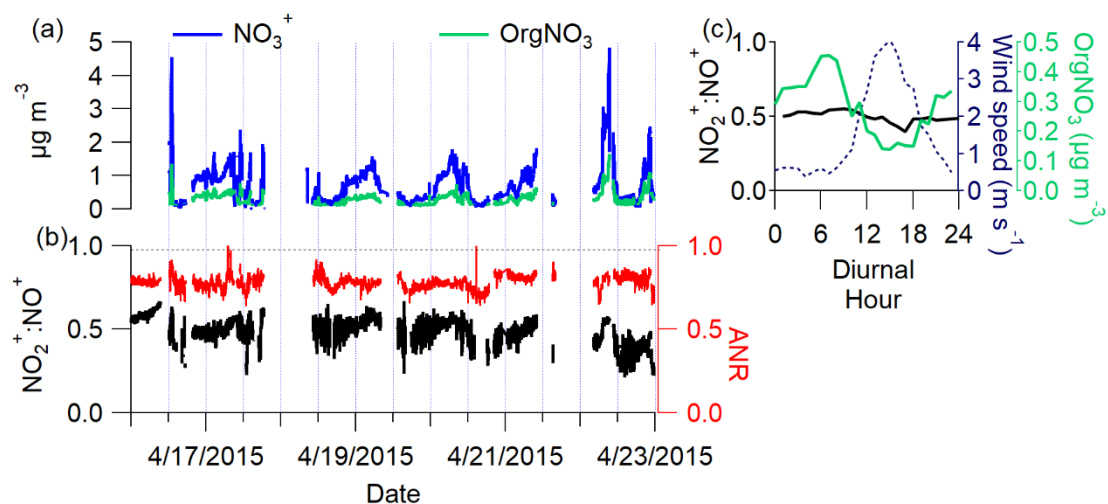

Figure S17: Time series of a) organic nitrate, nitrate, and the ratio of the two, b) particulate  $\text{NO}_2^+:\text{NO}^+$  and ANR, and diurnal pattern c) of  $\text{NO}_2^+:\text{NO}^+$  Wind speed, and  $\text{OrgNO}_3$  from NAMaSTE1 in April 2015, in the Kathmandu Valley, Nepal.



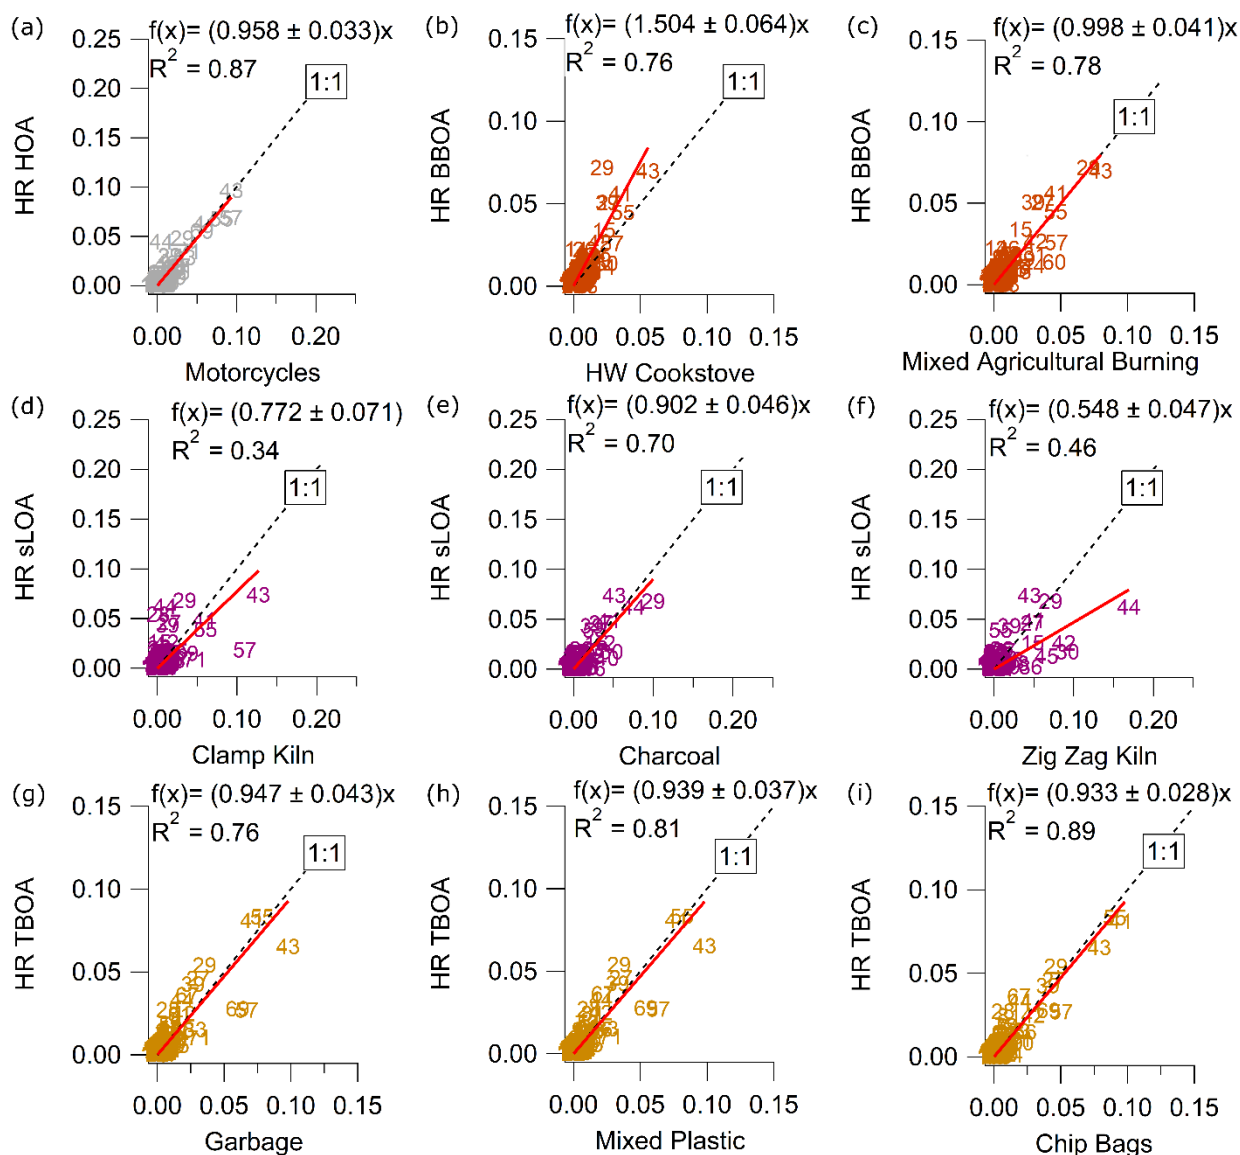

Figure S18: Comparison of HR-AMS PMF source factors and direct source measurement mass spectra for NAMaSTE1 in Kathmandu, Nepal, 2015. (a) HR HOA compared to motorcycle emissions, (b) BBOA compared to hardwood cookstoves emissions, (c) BBOA compared to mixed agricultural burning emissions, (d) sLOA compared to clamp style brick kilns, (e) sLOA compared to Charcoal, (f) sLOA compared to zig-zag style brick kilns emissions, (g) TBOA compared to garbage burning emissions, (h) TBOA compared to mixed plastic burning, (i) TBOA compared to burning chip bag emissions.



Table S13: OA Factor daily averages from NAMaSTE1, April 2015, Bode, Madhyapur, Kathmandu Valley, Nepal.

| Diurnal Hour | HOA ( $\mu\text{g m}^{-3}$ ) | BBOA ( $\mu\text{g m}^{-3}$ ) | TBOA ( $\mu\text{g m}^{-3}$ ) | sLOA ( $\mu\text{g m}^{-3}$ ) | OOA1 ( $\mu\text{g m}^{-3}$ ) | OOA2 ( $\mu\text{g m}^{-3}$ ) | OOA3 ( $\mu\text{g m}^{-3}$ ) |
|--------------|------------------------------|-------------------------------|-------------------------------|-------------------------------|-------------------------------|-------------------------------|-------------------------------|
| 0            | 2.2                          | 2.5                           | 1.0                           | 0.2                           | 2.2                           | 3.7                           | 2.1                           |
| 1            | 1.3                          | 2.1                           | 0.7                           | 0.5                           | 3.9                           | 3.5                           | 1.9                           |
| 2            | 1.0                          | 2.3                           | 0.5                           | 1.0                           | 3.9                           | 3.4                           | 1.5                           |
| 3            | 1.6                          | 2.5                           | 0.7                           | 1.3                           | 3.7                           | 3.0                           | 1.6                           |
| 4            | 2.0                          | 2.7                           | 1.0                           | 1.2                           | 2.1                           | 2.3                           | 1.8                           |
| 5            | 2.3                          | 3.4                           | 1.1                           | 2.1                           | 2.0                           | 2.3                           | 1.7                           |
| 6            | 4.2                          | 4.4                           | 1.9                           | 2.7                           | 3.6                           | 2.2                           | 1.7                           |
| 7            | 3.7                          | 4.2                           | 1.7                           | 2.9                           | 3.1                           | 1.7                           | 2.0                           |
| 8            | 3.6                          | 3.8                           | 1.8                           | 2.0                           | 3.1                           | 2.5                           | 3.0                           |
| 9            | 4.1                          | 3.5                           | 2.1                           | 0.0                           | 7.0                           | 2.9                           | 4.4                           |
| 10           | 1.1                          | 1.2                           | 1.3                           | 0.0                           | 3.1                           | 3.1                           | 2.8                           |
| 11           | 1.3                          | 1.5                           | 1.9                           | 0.0                           | 3.4                           | 3.0                           | 3.5                           |
| 12           | 1.0                          | 0.9                           | 1.2                           | 0.0                           | 2.5                           | 3.2                           | 2.5                           |
| 13           | 1.0                          | 1.2                           | 1.1                           | 0.0                           | 2.8                           | 3.2                           | 1.8                           |
| 14           | 1.1                          | 0.9                           | 0.8                           | 0.0                           | 3.4                           | 3.2                           | 1.0                           |
| 15           | 0.7                          | 0.7                           | 0.6                           | 0.0                           | 3.1                           | 3.0                           | 0.6                           |
| 16           | 0.9                          | 1.0                           | 0.6                           | 0.1                           | 3.4                           | 2.6                           | 0.7                           |
| 17           | 1.1                          | 1.3                           | 0.7                           | 0.0                           | 4.3                           | 2.3                           | 0.6                           |
| 18           | 2.4                          | 2.3                           | 1.5                           | 0.0                           | 4.0                           | 2.4                           | 1.1                           |
| 19           | 4.6                          | 2.8                           | 5.9                           | 0.1                           | 1.7                           | 2.3                           | 1.7                           |
| 20           | 2.9                          | 2.7                           | 3.6                           | 0.1                           | 2.3                           | 3.0                           | 1.6                           |
| 21           | 2.2                          | 2.7                           | 1.7                           | 0.1                           | 4.1                           | 3.7                           | 1.7                           |
| 22           | 2.2                          | 2.9                           | 1.1                           | 0.3                           | 3.6                           | 3.8                           | 1.5                           |
| 23           | 2.2                          | 2.7                           | 1.0                           | 0.3                           | 2.9                           | 3.7                           | 1.8                           |

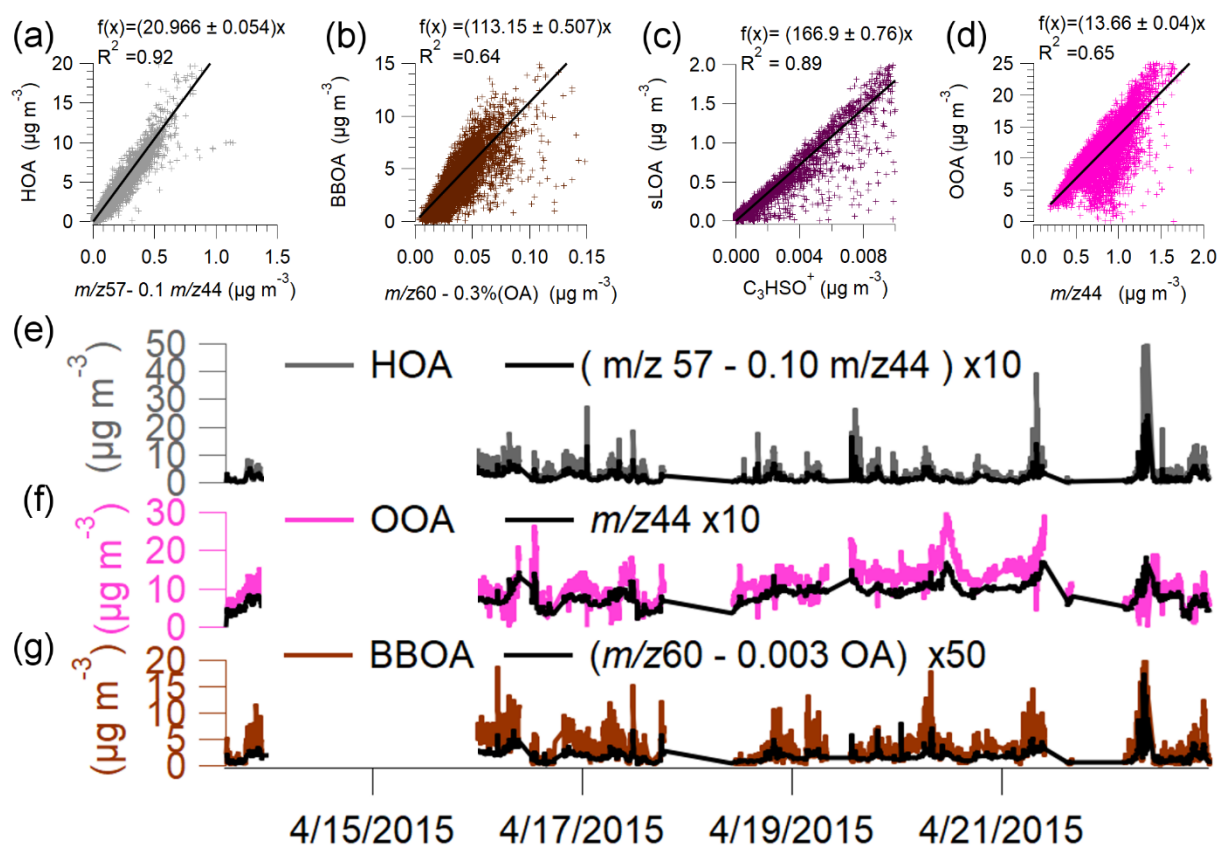

Figure S19: AMS-PMF source factors and tracer m/z from UMR measurements: (a) HOA vs.  $m/z 57$  OOA corrected (b) OOA vs.  $m/z 44$ ; (c) BBOA vs.  $m/z 60 - 0.3\%$  of OA; (d) TBOA vs.  $m/z 166$ . (e) LSOA vs.  $C_3HSO$  (f) Time series of OOA, BBOA, and HOA estimates in UMR compared to full PMF analysis of the HR data for NAMaSTE1, in April 2015 at Bode Madhyapur Thimi, Kathmandu Valley, Nepal.

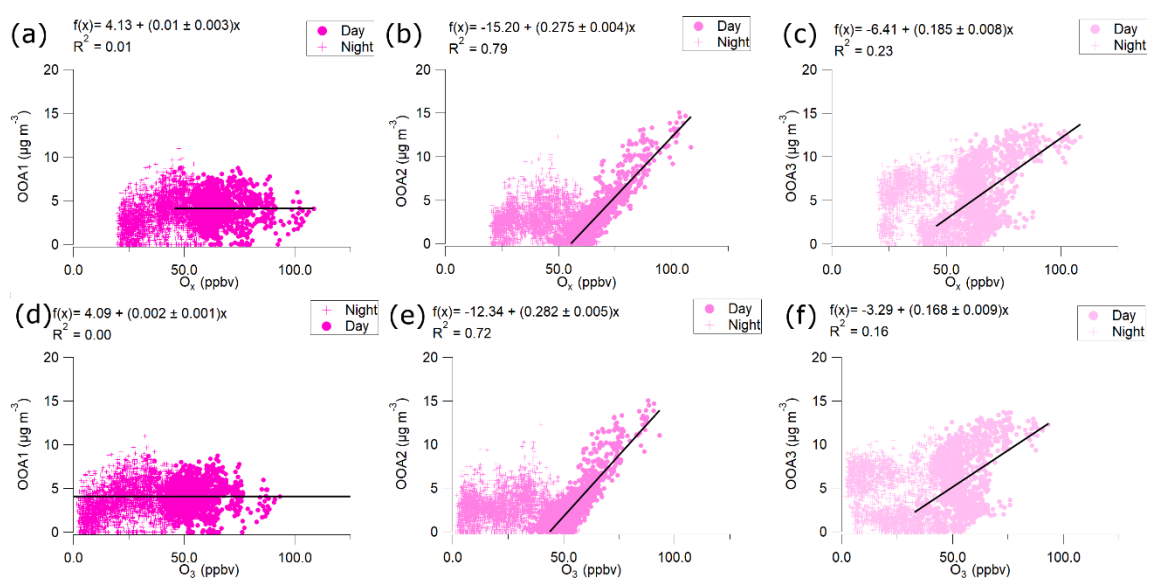

Figure SI10: Odd oxygen and ozone compared to oxygenated organic aerosols for daytime periods of NAMaSTE1, in Kathmandu Valley, Nepal, April 2015. Linear regression of daytime OOA1 and O<sub>x</sub> (a), OOA2 and O<sub>x</sub> (b), OOA3 and O<sub>x</sub> (c), OOA1 and O<sub>3</sub> (d), OOA2 and O<sub>3</sub> (e), OOA3 and O<sub>3</sub> (f).

Table S14: OA to OC ratios from NAMaSTE1 AMS-PMF factors, April 2015 at Bode in the Kathmandu Valley, Nepal, and other previous studies.

| Factor | Source                    | OA:OC ratios          |                             |                 |
|--------|---------------------------|-----------------------|-----------------------------|-----------------|
|        |                           | Goetz et al.,<br>2018 | Canagaratna et<br>al., 2015 | PMF<br>NAMaSTE1 |
| HOA    | Traffic                   | 1.30                  | 1.34                        | 1.42            |
| BBOA   | Biomass<br>Burning        | 1.62                  | 1.64                        | 1.68            |
| TBOA   | Mixed Plastics<br>Burning | 1.42                  |                             | 1.40            |
| sLOA   | Clamp Brick<br>Kilns      | 1.32                  |                             | 1.45            |
| OOA1   | SVOOA                     |                       | 2.25                        | 2.33            |
| OOA2   | MVOOA                     |                       |                             | 1.71            |
| OOA3   | LVOOA                     |                       | 1.84                        | 1.87            |

Table S15: OC to BC ratios from previous studies and NAMaSTE1 factors in April 2015 at Bode in the Kathmandu Valley, Nepal.

| OC:BC ratios |                    |                         |                     |                         |                        |                  |           |
|--------------|--------------------|-------------------------|---------------------|-------------------------|------------------------|------------------|-----------|
| Factor       | Goetz et al., 2018 | Jayarathne et al., 2018 | Weyant et al., 2014 | Andrea and Merlet, 2001 | Christian et al., 2010 | Zhu et al., 2002 | NAMaSTE 1 |
| HOA          | -                  | -                       | -                   | -                       | -                      | 0.23-6.25        | 0.45      |
| BBOA         | 3.7                | 6.44                    | -                   | 1.8-58                  | -                      | -                | 3.7       |
| TBOA         | 1                  | -                       | -                   | -                       | 2.3                    | -                | 1         |
| sLOA         | 1-52               | -                       | 0.1-0.29            | -                       | 0.16                   | -                | 0.5       |

Table S16: OC source fractional comparison between AMS-PMF PM<sub>1</sub> and CMB-OCC PM<sub>2.5</sub> analysis from NAMaSTE1 in Bode Thimi, Nepal, April 2015.

| OC Source                         | Daytime (%) | Overnight (%) |
|-----------------------------------|-------------|---------------|
| PM <sub>2.5</sub> CMB GAS         | 15.1        | 21.9          |
| PM <sub>1</sub> PMF HOA           | 17.4        | 20.2          |
| PM <sub>2.5</sub> CMB BB          | 16.5        | 14.2          |
| PM <sub>1</sub> PMF BBOA          | 15          | 20.6          |
| PM <sub>2.5</sub> CMB Trash       | 17.5        | 17.1          |
| PM <sub>1</sub> PMF TBOA          | 14.3        | 11.5          |
| PM <sub>2.5</sub> CMB Coal        | 3.9         | 5.3           |
| PM <sub>1</sub> PMF sLOA          | 3.5         | 9.3           |
| PM <sub>2.5</sub> CMB SOA + Other | 47          | 41.5          |
| PM <sub>1</sub> PMF Sum OOA       | 49.8        | 32.1          |



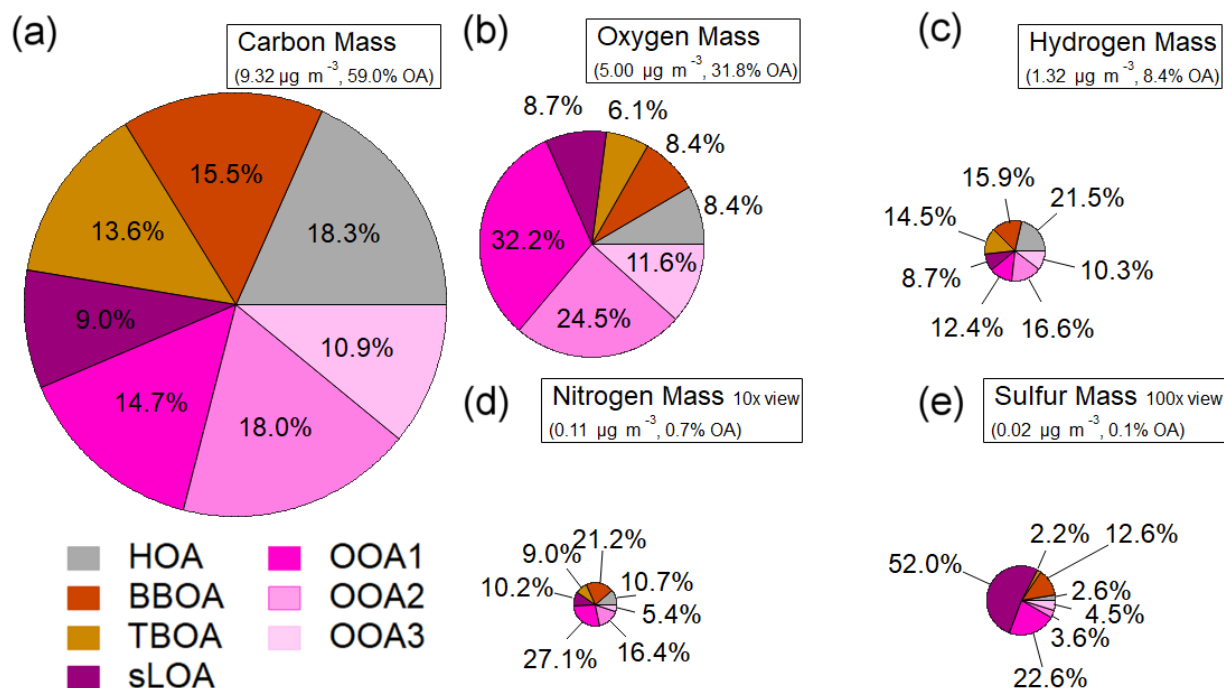

Figure SI11: Average mass and OA source fraction of elemental (a) carbon, (b) oxygen, (c) hydrogen, (d) nitrogen, and (e) sulfur, from each of the AMS-PMF factors for NAMaSTE1, Kathmandu Valley, Nepal April 2015.

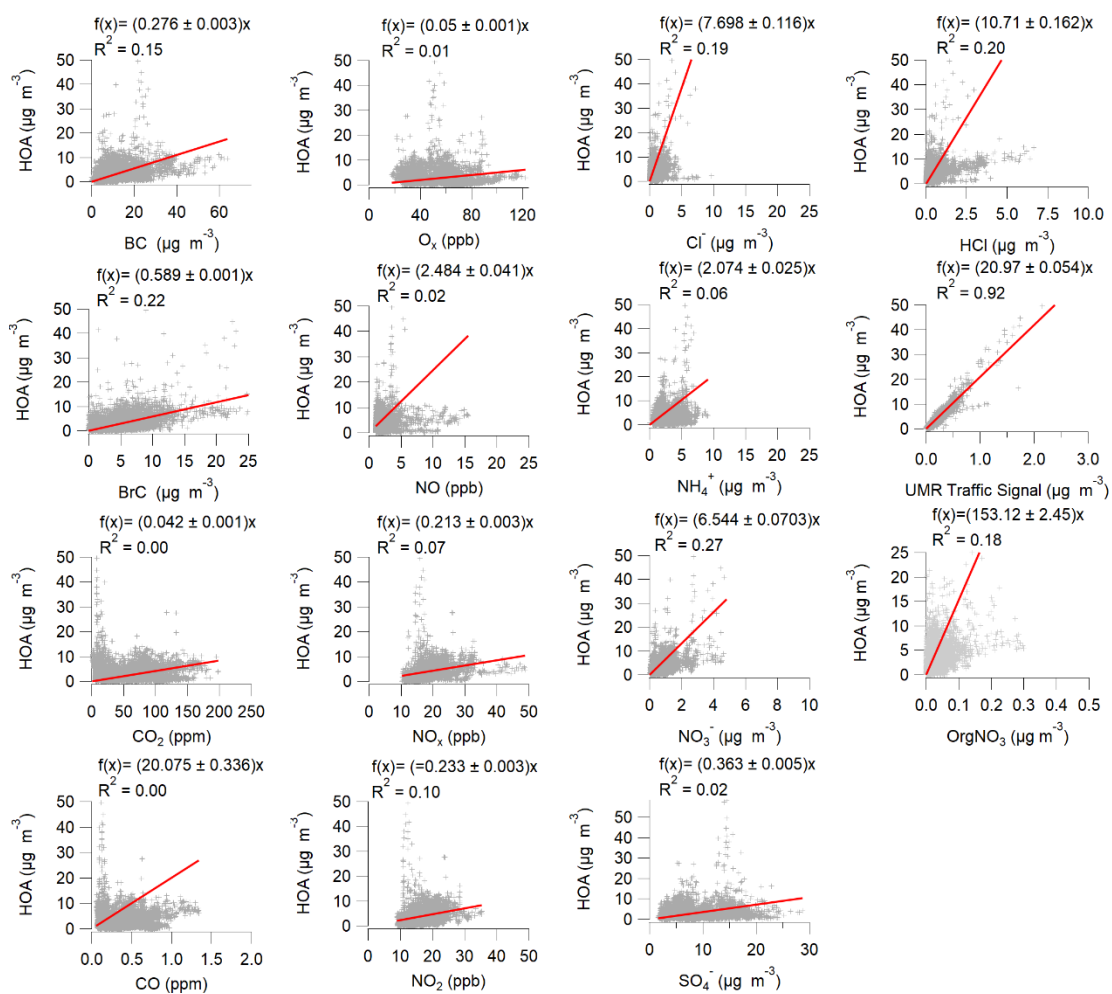

Figure SI12: Comparison of HOA to tracer aerosol and gas-phase species for NAMaSTE1 in April 2015 in Kathmandu Valley, Nepal.

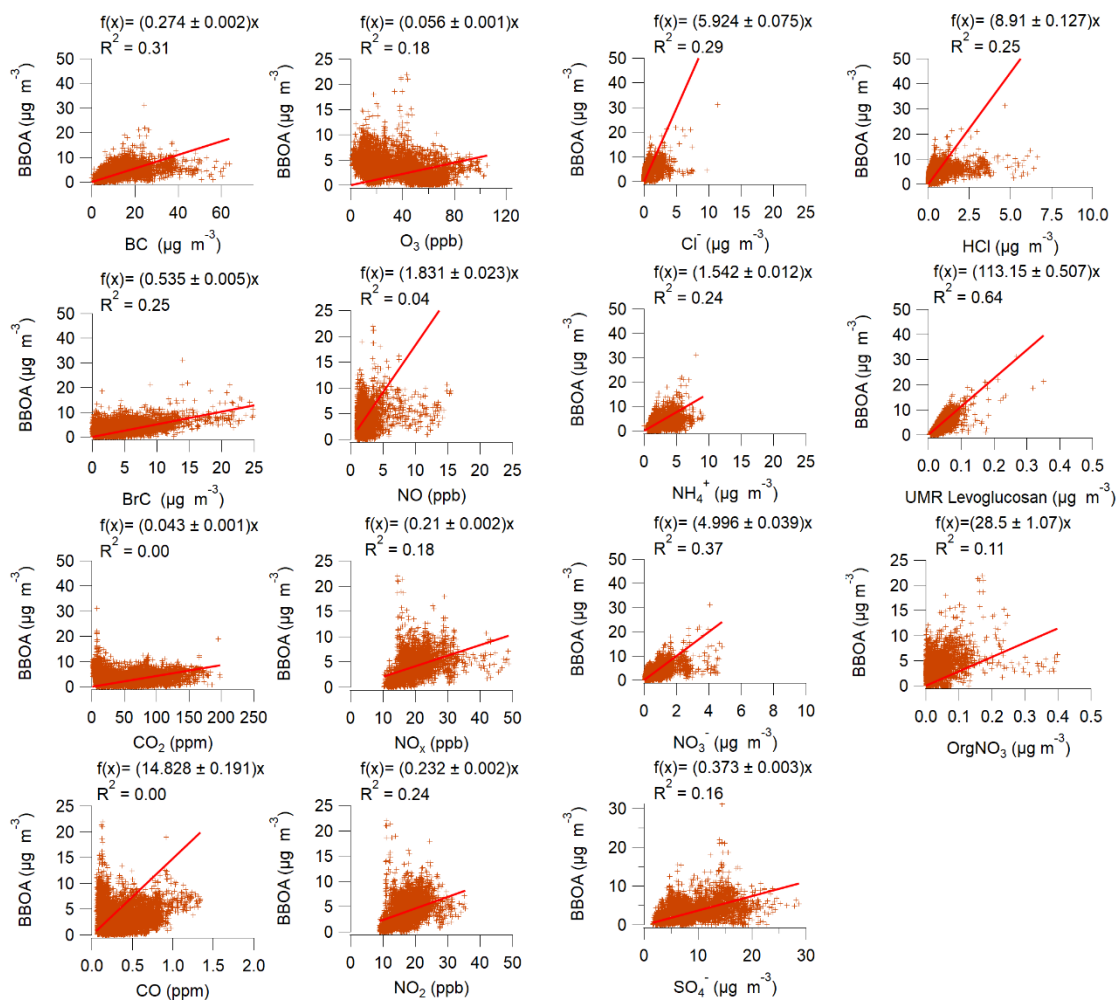

Figure SI13: Comparison of BBOA to tracer aerosol and gas-phase species for NAMaSTE1 in April 2015 in Kathmandu Valley, Nepal.

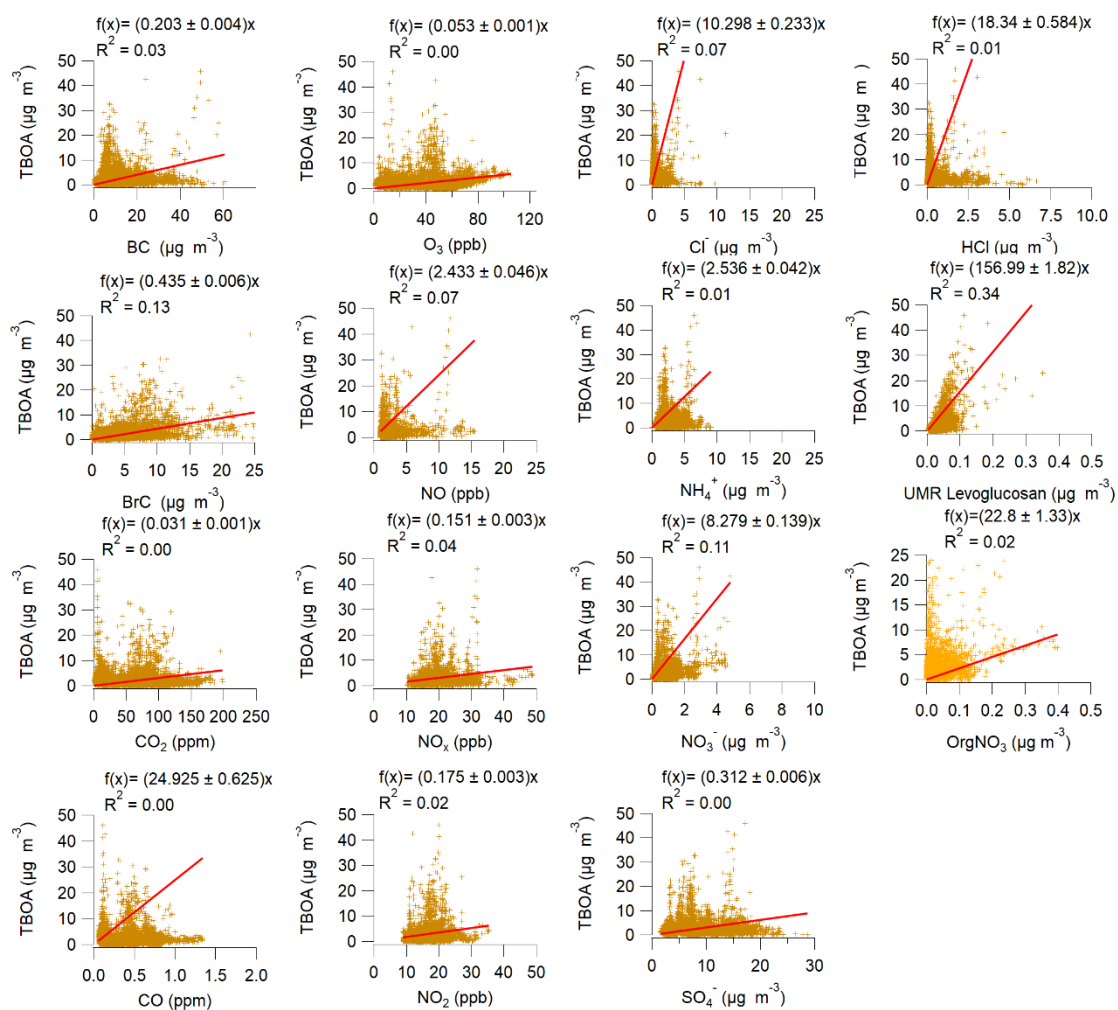

Figure SI14: Comparison of TBOA to tracer aerosol and gas-phase species, for NAMaSTE1 in April 2015, Kathmandu, Nepal.

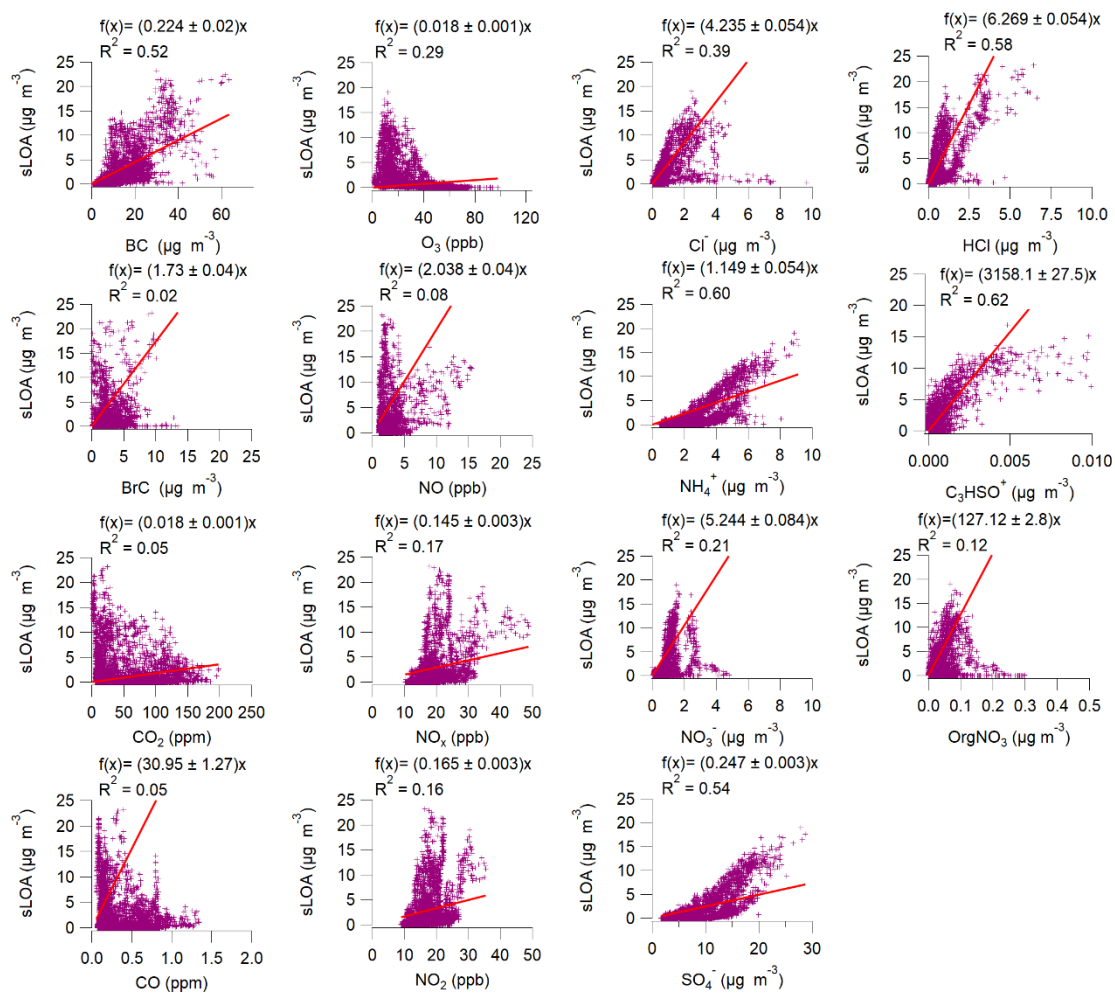

Figure SI15: Comparison of sLOA to tracer aerosol and gas-phase species for NAMaSTE1 in April 2015 in Kathmandu Valley, Nepal.

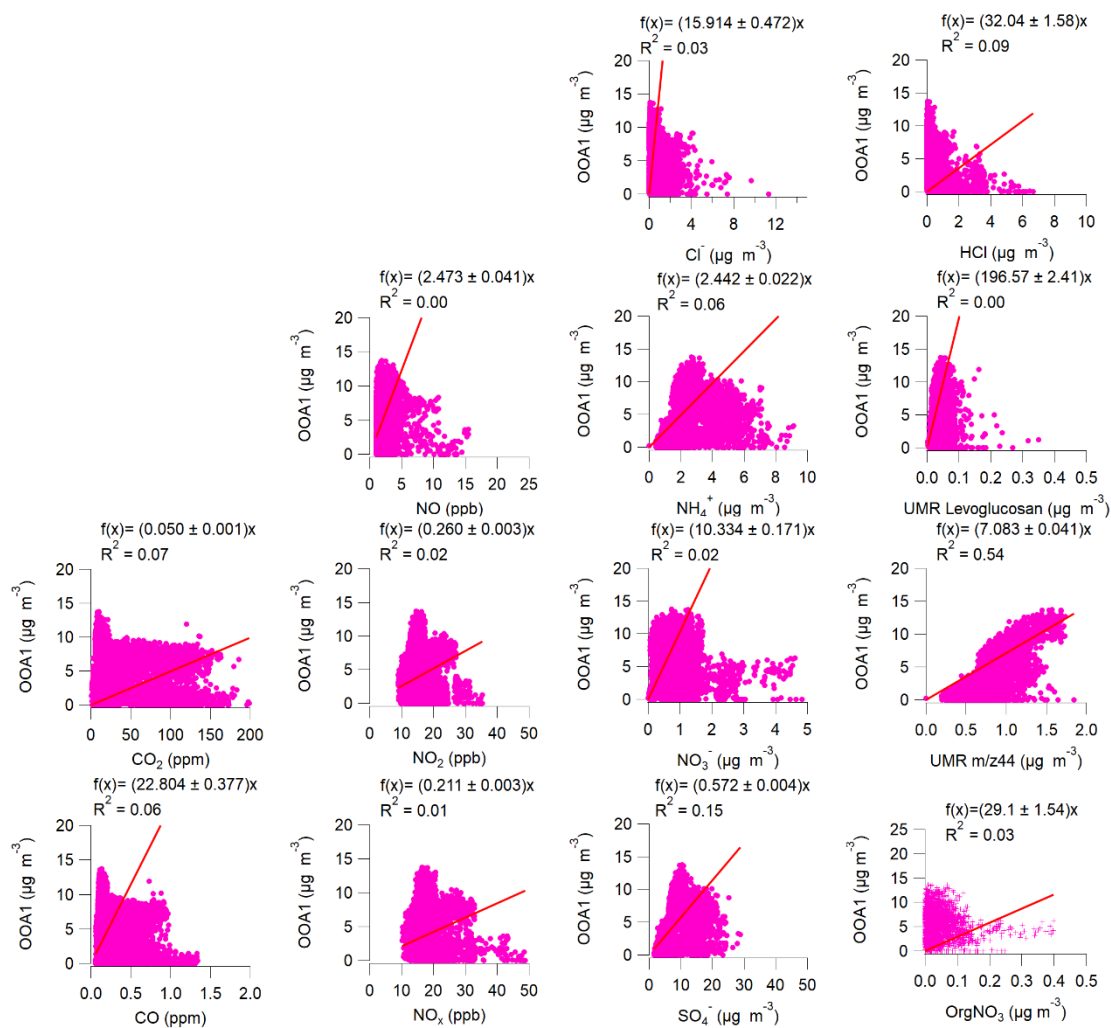

Figure SI16: Comparison of OOA1 to tracer aerosol and gas-phase species for NAMaSTE1 in April 2015 in Kathmandu Valley, Nepal.

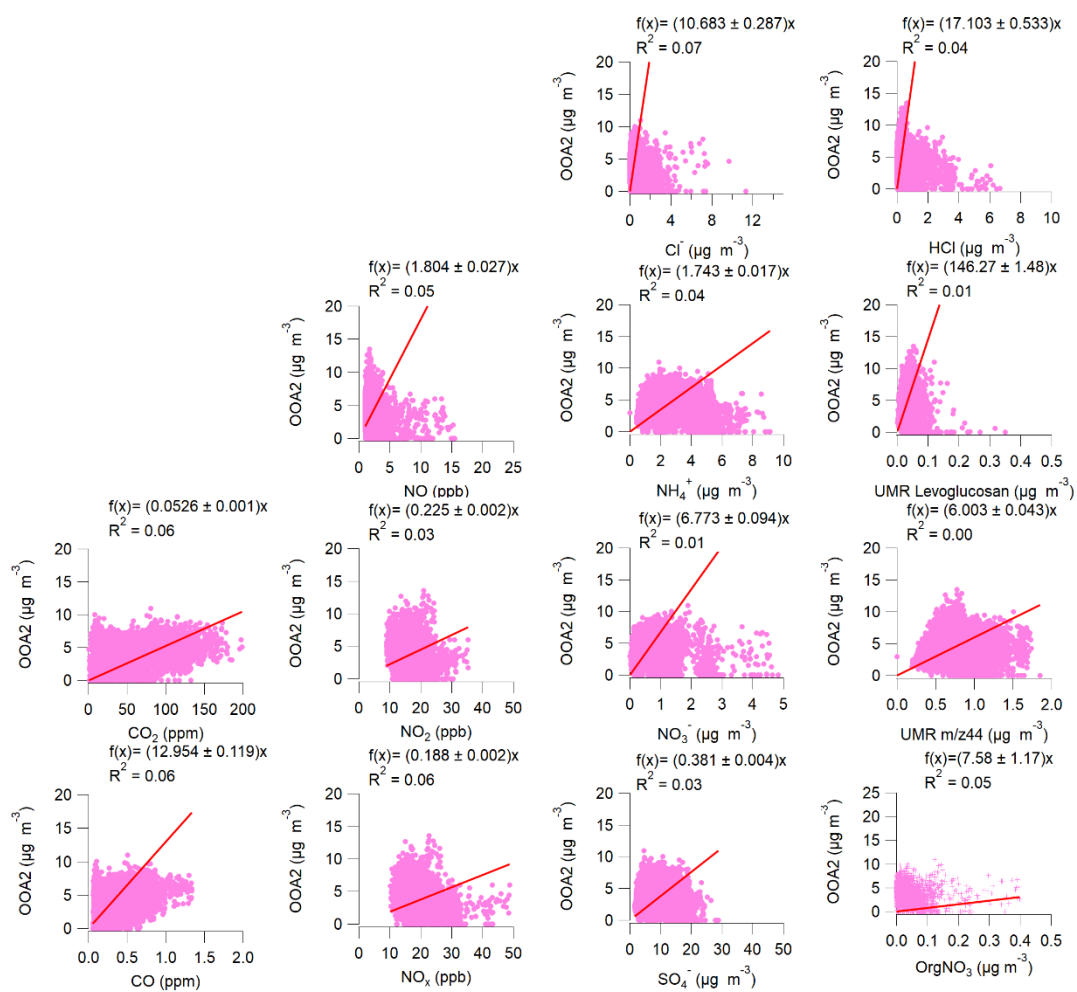

Figure SI17: Comparison of OOA2 to tracer aerosol and gas-phase species for NAMaSTE1 in April 2015 in Kathmandu Valley, Nepal.

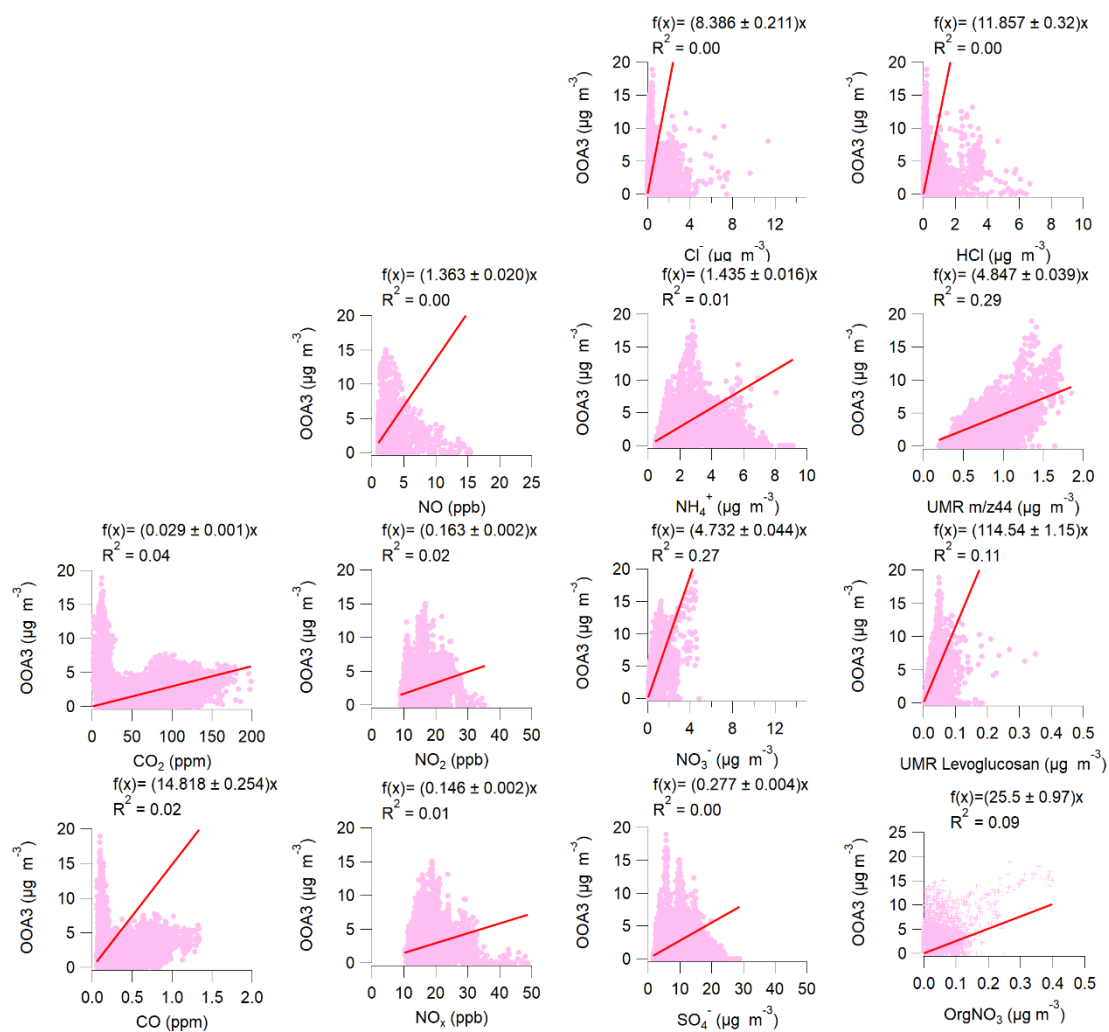

Figure S118: Comparison of OOA3 to tracer aerosol and gas-phase species for NAMaSTE1in April 2015 in Kathmandu Valley, Nepal.
